# Supplementary material
Source: Springer Nature journal article supplement (https://www.springermedizin.de/resource/supplementary/12885_2007_1091_MOESM6_ESM.pdf/9471096)

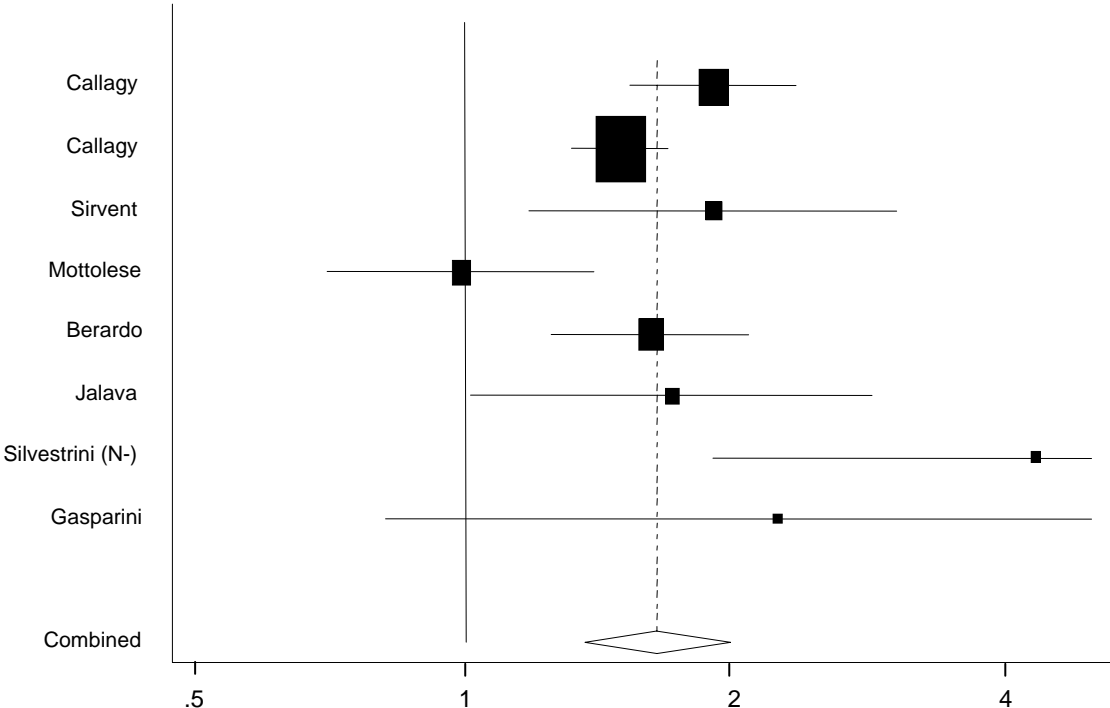

Supplement: MOESM6 [file 9471096]
